# Supplementary material for: Perfusion Air Culture of Precision-Cut Tumor Slices: An Ex Vivo System to Evaluate Individual Drug Response under Controlled Culture Conditions
Source: MDPI journal article supplement (doi:10.3390/cells12050807), 2023-03-04
Supplement: s1 [file s1]

# Supplementary material

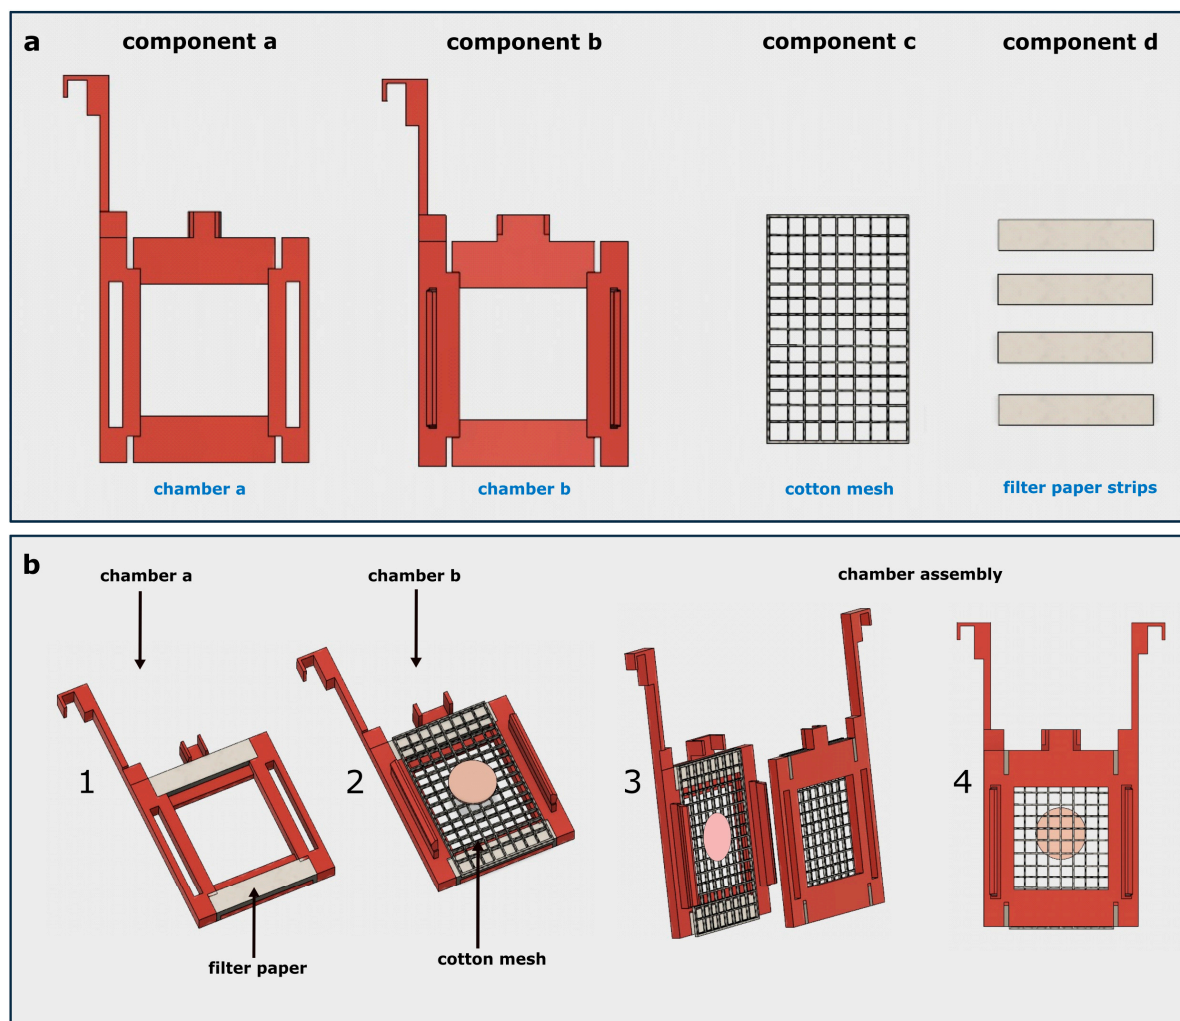

**Figure S1.** Structure and assembly of the perfusion air culture (PAC) system. **(a)** The 4 components a-d of the chamber. **(b)** The assembly process of the chamber with a tissue slice. The chamber consists of two main components (a and b) which can be assembled easily under sterile conditions using a click system. Both components together form the holder for the organotypic support (component c) for the tissue slices. The filter papers (component d) are fixed on the chambers (components a and b) and serve as a reservoir for the nutrient fluid. The tumor slices are inserted in between two organotypic supports and then fixed in the chamber.

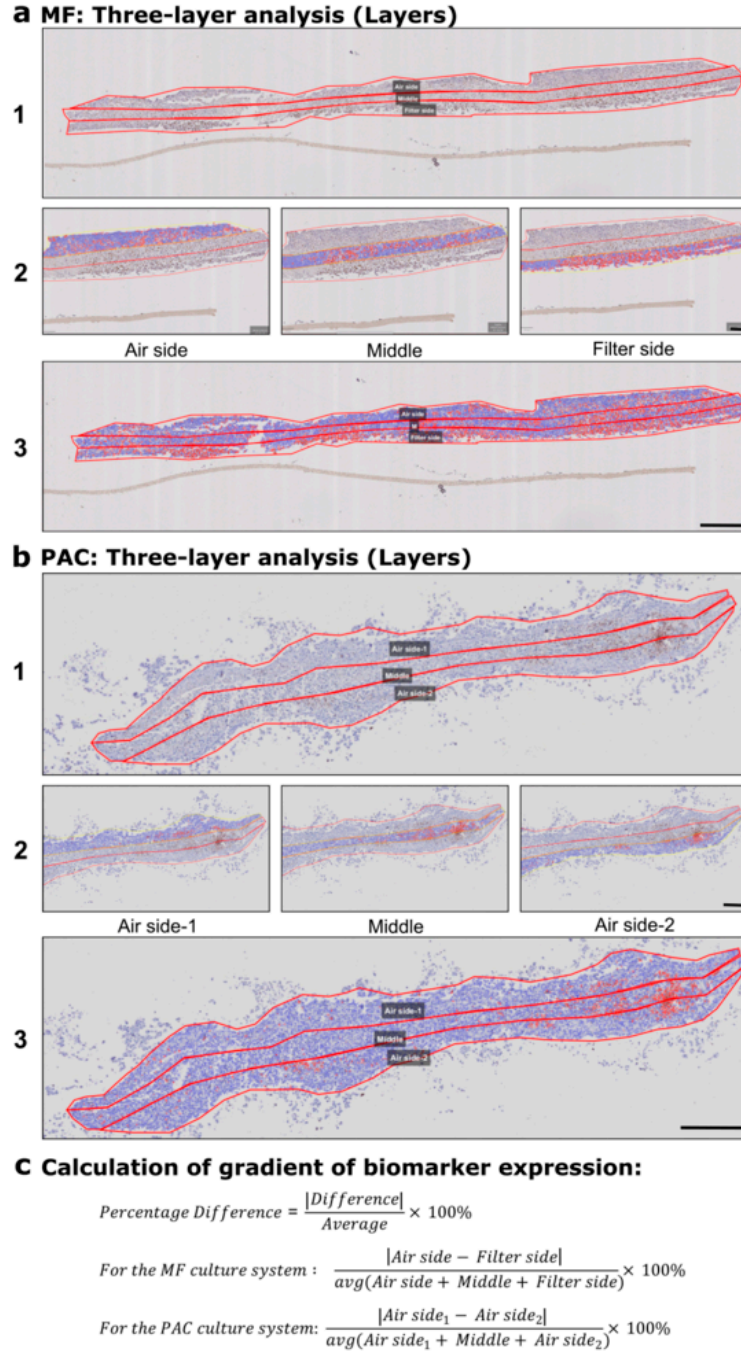

**Figure S2.** Workflow of three-layer analysis for quantification of loco-regional changes of biomarker expression in tumor slices cultivated using the Millipore filter (MF) system or the perfusion air culture (PAC) system. (a-1) Immunohistochemical staining images of whole tumor slices cultured in the MF system were split into three lengthwise layers (Filter side, Middle, Air side). (a-2) The layers were successively analyzed for biomarker expression to (a-3) quantify biomarker-positive cells in the tumor slice. Scale bar represents 400  $\mu\text{m}$ . (b-1) Immunohistochemical staining images of whole tumor slices cultured in the MF system were split into three longitudinal layers (Air side-1, Middle, Air side-2). (b-2) The layers were successively analyzed for biomarker expression to (b-3) quantify biomarker-positive cells in the tumor slice. Scale bar represents 400  $\mu\text{m}$ . (c) The percentage difference of biomarker-positive cells between the outer layers of the tumor slices was calculated to determine the gradient across different areas of the tumor slice.

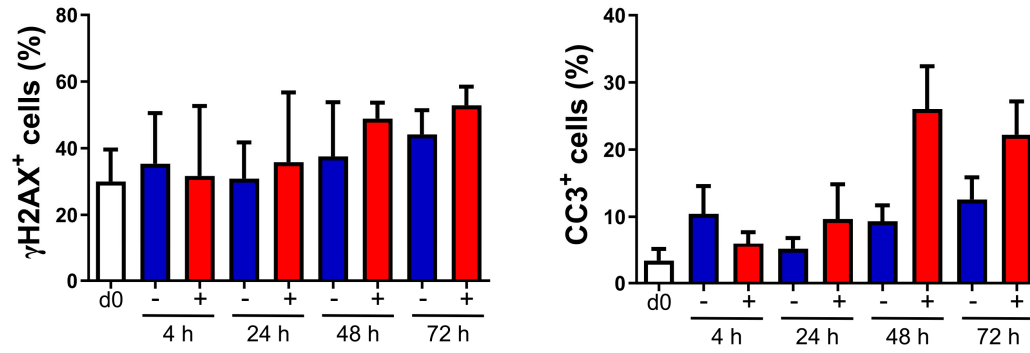

**Figure S3.** Quantification of the percentage of  $\gamma$ H2AX and CC3 positive cells at different time points after cisplatin treatment of primary human ovarian tumor slices in the Millipore filter (MF) system. Primary ovarian tumor slices were cultured without cisplatin (-) or with cisplatin(+) for different time points (4 h, 24 h, 48 h and 72 h) in the Millipore filter (MF) system. Data are from experiments of four mice.

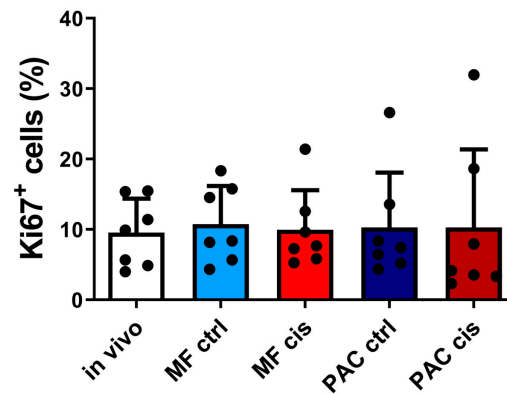

**Figure S4.** Quantification of the percentage of Ki67 positive cells of tumor slices cultured in the Millipore filter (MF) and perfusion air culture (PAC) systems. Primary ovarian tumor slices were cultured without cisplatin (ctrl) or with cisplatin (cis) for 3 days in the Millipore filter (MF) or the perfusion air culture (PAC) systems. In the figure, each black dot represents one patient tumor. Data are from 7 patient experiments.

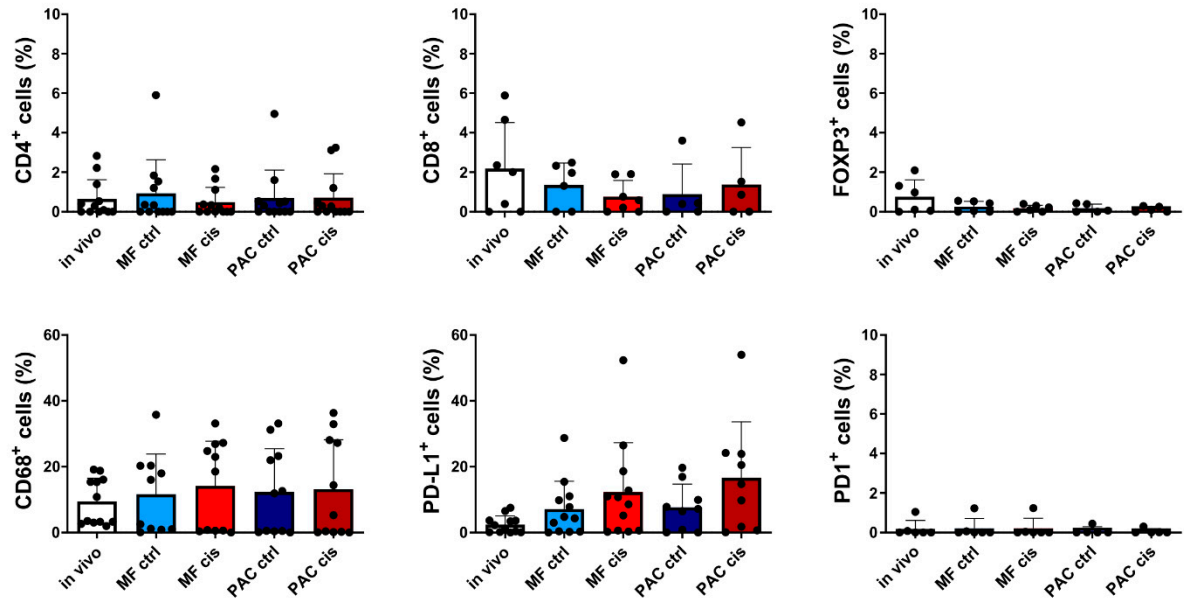

**Figure S5.** Quantification of the percentage of CD4, CD8, FOXP3, CD68, PD-L1 and PD1 positive cells of tumor slices in the Millipore filter (MF) and perfusion air culture (PAC) system. Primary ovarian tumor slices were cultured without cisplatin (ctrl) or with cisplatin (cis) for 3 days in the Millipore filter (MF) or the perfusion air culture (PAC) systems. Data from experiments of 6 to 12 patients. In the figures, each black dot represents one patient tumor.

**Table S1.** The percentage difference in biomarker expression of estrogen receptor (ER), hypoxia-inducible factor 1 $\alpha$  (HIF1 $\alpha$ ), phosphor-Histone H2A.X ( $\gamma$ H2A $\alpha$ ) and Ki67 between the filter side and air side (Millipore filter (MF)) or air side-1 and air side-2 (Perfusion air culture (PAC)) observed in slices from MCF-7 CDX after cultivation in the MF or PAC system. For the three-layer analysis of loco-regional changes, the tumor slices were lengthwise divided into three sections (MF: air side, middle, filter side; PAC: air side-1, middle, air side-2). The absolute difference in positively stained cells between the two outer tumor slice layers was divided by the sum of all three layers to calculate the percentage difference in biomarker expression. Red indicates the presence of a gradient (percentage difference of > 20%). Data shown are from the experiments of 6 different mice for d3 samples and 4 mice for d7 samples.

**MCF-7 breast CDX**

| Marker                | MCF7 Xenograft | Percentage difference in biomarker expression |       |       |       |
|-----------------------|----------------|-----------------------------------------------|-------|-------|-------|
|                       |                | d3                                            |       | d7    |       |
|                       |                | MF                                            | PAC   | MF    | PAC   |
| ER                    | #1             | 64.95                                         | 16.14 | 92.77 | 19.51 |
|                       | #2             | 34.63                                         | 9.52  | 49.53 | 2.86  |
|                       | #3             | 53.42                                         | 4.38  | 95.68 | 16.83 |
|                       | #4             | 42.79                                         | 1.14  |       |       |
|                       | #5             | 44.90                                         | 4.39  |       |       |
|                       | #6             | 68.67                                         | 5.18  |       |       |
|                       | #7             |                                               |       | 81.77 | 0.73  |
| HIF1 $\alpha$         | #1             | 49.55                                         | 13.44 | 35.14 | 0.18  |
|                       | #2             | 51.90                                         | 9.64  | 28.04 | 3.11  |
|                       | #3             | 94.71                                         | 5.75  | 7.37  | 19.97 |
|                       | #4             | 101.51                                        | 4.25  |       |       |
|                       | #5             | 79.81                                         | 1.85  |       |       |
|                       | #6             | 42.50                                         | 5.45  |       |       |
|                       | #7             |                                               |       | 20.73 | 4.06  |
| $\gamma$ H2A $\alpha$ | #1             | 13.35                                         | 9.67  | 10.12 | 13.35 |
|                       | #2             | 26.97                                         | 8.23  | 12.70 | 2.74  |
|                       | #3             | 0.64                                          | 19.88 | 21.67 | 10.83 |
|                       | #4             | 5.89                                          | 0.39  |       |       |
|                       | #5             | 6.14                                          | 2.35  |       |       |
|                       | #6             | 21.68                                         | 1.19  |       |       |
|                       | #7             |                                               |       | 23.15 | 6.97  |
| Ki67                  | #1             | 0.39                                          | 4.74  | 15.72 | 5.43  |
|                       | #2             | 5.51                                          | 5.63  | 56.37 | 1.10  |
|                       | #3             | 31.79                                         | 4.82  | 84.59 | 5.42  |
|                       | #4             | 41.15                                         | 2.94  |       |       |
|                       | #5             | 2.87                                          | 3.07  |       |       |
|                       | #6             | 20.04                                         | 0.61  |       |       |
|                       | #7             |                                               |       | 61.86 | 4.76  |

**Table S2.** The percentage difference in biomarker expression of hypoxia-inducible factor 1 $\alpha$  (HIF1 $\alpha$ ), phosphor-Histone H2A.X ( $\gamma$ H2Ax), Ki67 and cleaved-Caspase 3 (CC3) between the filter side and air side (Millipore filter (MF)) or air side-1 and air side-2 (Perfusion air culture (PAC)) observed in slices from H1437 CDX after cultivation in the MF or PAC system. For the three-layer analysis of loco-regional changes, the tumor slices were lengthwise divided into three sections (MF: air side, middle, filter side; PAC: air side-1, middle, air side-2). The absolute difference in positively stained cells between the two outer tumor slice layers was divided by the sum of all three layers to calculate the percentage difference in biomarker expression. Red indicates the presence of a gradient (percentage difference of > 20%). Data shown are from the CDX of 3 different mice.

**H1437 lung CDX**

| Marker        | H1437 Xenograft | Percentage difference in biomarker expression |      |
|---------------|-----------------|-----------------------------------------------|------|
|               |                 | d3                                            |      |
|               |                 | MF                                            | PAC  |
| HIF1 $\alpha$ | #1              | 68.10                                         | 6.84 |
|               | #2              | 68.27                                         | 0.50 |
|               | #3              | 111.24                                        | 1.84 |
| $\gamma$ H2Ax | #1              | 48.67                                         | 3.85 |
|               | #2              | 106.14                                        | 5.13 |
|               | #3              | 124.46                                        | 2.31 |
| Ki67          | #1              | 107.24                                        | 2.72 |
|               | #2              | 81.31                                         | 5.10 |
|               | #3              | 18.42                                         | 4.61 |
| CC3           | #1              | 92.12                                         | 2.93 |
|               | #2              | 59.16                                         | 0.28 |
|               | #3              | 92.95                                         | 4.23 |

**Table S3.** The percentage difference in biomarker expression of hypoxia-inducible factor 1 $\alpha$  (HIF1 $\alpha$ ), phosphor-Histone H2A.X ( $\gamma$ H2A $\alpha$ ), Ki67 and cleaved-Caspase 3 (CC3) between the filter side and air side (Millipore filter (MF)) or air side-1 and air side-2 (Perfusion air culture (PAC)) observed in slices from primary human ovarian cancer patients after cultivation in the MF or PAC system. For the three-layer analysis of loco-regional changes, the tumor slices were lengthwise divided into three sections (MF: air side, middle, filter side; PAC: air side-1, middle, air side-2). The absolute difference in positively stained cells between the two outer tumor slice layers was divided by the sum of all three layers to calculate the percentage difference in biomarker expression. Red indicates the presence of a gradient (percentage difference of > 20%). Data shown are from experiments of 15 patients.

**Primary human ovarian cancer**

| Marker        | Patient | Percentage difference in biomarker expression |         |
|---------------|---------|-----------------------------------------------|---------|
|               |         | d3                                            |         |
|               |         | MF                                            | PAC     |
| HIF1 $\alpha$ | #1      | 5.19                                          | -4.39   |
|               | #2      | 1.36                                          | -1.10   |
|               | #3      | 134.14                                        | 19.82   |
|               | #4      | 35.71                                         | -10.09  |
|               | #5      | -6.91                                         | -122.34 |
|               | #6      | 206.05                                        | 31.02   |
|               | #7      | 33.63                                         | -2.26   |
|               | #8      | 11.92                                         | -17.32  |
|               | #9      | -2.29                                         | -2.32   |
|               | #10     | 110.14                                        | -17.02  |
|               | #11     | 47.07                                         | 8.89    |
|               | #12     | 87.43                                         | -12.62  |
|               | #13     | 125.19                                        | 7.65    |
|               | #14     | 24.30                                         | 13.69   |
|               | #15     | -18.52                                        | -20.41  |
| Ki67          | #1      | -2.17                                         | 24.59   |
|               | #2      | 11.26                                         | 13.28   |
|               | #3      | 98.14                                         | 26.90   |
|               | #4      | 24.86                                         | 0.95    |
|               | #5      | -15.83                                        | -24.57  |
|               | #6      | 106.28                                        | -6.22   |
|               | #7      | 45.67                                         | 10.50   |
|               | #8      | 1.40                                          | 7.24    |
|               | #9      | -6.32                                         | -1.59   |
|               | #10     | 113.24                                        | 9.64    |
|               | #11     | 103.65                                        | 5.02    |
|               | #12     | 59.15                                         | -6.57   |
|               | #13     | 35.76                                         | 16.01   |
|               | #14     | 137.83                                        | -8.63   |
|               | #15     | -14.99                                        | 75.41   |



**Table S4.** The fold-changes in transcriptional biomarkers observed in slices from MCF-7 CDX, H1437 CDX and primary human ovarian tumors after cultivation in the Millipore filter (MF) or perfusion air culture (PAC) system. Red indicates significantly upregulated genes; green indicates significantly downregulated genes (p-value < 0.05).

### MCF-7 breast CDX

|           | Process (Functional gene grouping) | Upstream Pathway/Transcription Factor | expressionCond1 | ID       | logFC        | P.Value     | adj.P.Val   |
|-----------|------------------------------------|---------------------------------------|-----------------|----------|--------------|-------------|-------------|
| PAC vs d0 | apoptosis                          | p53/NFkB                              | down            | TRAF1    | -2.005655965 | 9.69293E-07 | 3.90948E-05 |
|           | apoptosis                          | p53/NFkB                              | down            | BCL2     | -1.617170634 | 3.56854E-06 | 0.000107948 |
|           | apoptosis                          | p53/NFkB                              | down            | TP53AIP1 | -1.778741559 | 6.33584E-06 | 0.000127773 |
|           | apoptosis                          | p53/NFkB                              | up              | IER3     | 1.348605002  | 1.26163E-05 | 0.000218081 |
|           | apoptosis                          | NFkB                                  | down            | ALOX12   | -1.341068964 | 0.000504107 | 0.003258684 |
|           | apoptosis                          | NFkB                                  | down            | NOS2A    | -2.163061512 | 0.000585419 | 0.00346564  |
|           | apoptosis                          | p53                                   | down            | BCL2L14  | -1.073715416 | 0.0007265   | 0.00399575  |
|           | cell cycle                         |                                       | down            | TP73     | -2.32592196  | 8.18118E-09 | 9.89923E-07 |
|           | cell cycle                         | p53/NFkB                              | down            | TERT     | -1.818063518 | 6.28131E-06 | 0.000127773 |
|           | cell cycle                         | p53                                   | down            | CCNG1    | -1.389179567 | 2.40452E-05 | 0.000363684 |
|           | DNA damage/repair                  | HIF1a                                 | down            | XPA      | -1.193623749 | 4.6059E-05  | 0.000619238 |
|           | DNA damage/repair                  | prosurvival signals and oncogenes     | down            | BLM      | -1.298156571 | 5.45866E-05 | 0.00060498  |
|           | DNA damage/repair                  | p53                                   | down            | SESN1    | -1.057576028 | 9.77233E-05 | 0.001074956 |
|           | p38/JNK                            | p38                                   | up              | PHLDA1   | 1.012846155  | 0.000248105 | 0.002309285 |
|           | ROS                                | NFkB/transcr. regulated under hypoxia | up              | HIF1A    | 1.180760224  | 0.000601475 | 0.00346564  |
|           | UPR/ER stress                      | UPR target gene                       | down            | EPHB1    | -1.981288875 | 2.68508E-07 | 1.62447E-05 |
|           | UPR/ER stress                      | UPR target gene                       | down            | PLA2G6   | -1.019594051 | 0.000325182 | 0.002481483 |
| MF vs d0  | apoptosis                          | p53/NFkB                              | down            | BCL2     | -1.960611405 | 2.46702E-07 | 1.49255E-05 |
|           | apoptosis                          | p53/NFkB                              | up              | IER3     | 1.594328692  | 1.41718E-06 | 4.28698E-05 |
|           | apoptosis                          | NFkB                                  | down            | BCL2L1   | -1.314326066 | 0.000144866 | 0.001433282 |
|           | apoptosis                          | p53/NFkB                              | down            | TP53AIP1 | -1.210185287 | 0.000478411 | 0.002893389 |
|           | apoptosis                          | NFkB                                  | down            | NOS2A    | -1.542577832 | 0.008384952 | 0.02601485  |
|           | cell cycle                         |                                       | down            | TP73     | -1.860393869 | 2.42734E-07 | 1.49255E-05 |
|           | cell cycle                         | p53/NFkB                              | down            | TP63     | -1.35710972  | 0.000150902 | 0.001433282 |
|           | cell cycle                         | p53/NFkB                              | down            | TERT     | -1.374074016 | 0.000165834 | 0.001433282 |
|           | cell cycle                         | p53                                   | down            | CCNA2    | -1.021728382 | 0.005285863 | 0.019381499 |
|           | DNA damage/repair                  | p53/NFkB                              | down            | TP53I3   | -1.529581821 | 8.14596E-06 | 0.000123208 |
|           | DNA damage/repair                  | HIF1a                                 | down            | XPA      | -1.232022901 | 3.18621E-05 | 0.000428368 |
|           | DNA damage/repair                  | transcr. inducible by irradiation     | down            | XRCC3    | -1.031817735 | 0.000162619 | 0.001433282 |
|           | DNA damage/repair                  | prosurvival signals and oncogenes     | down            | BLM      | -1.088122797 | 0.000354517 | 0.00225771  |
|           | p38/JNK                            | p38                                   | up              | PHLDA1   | 1.485114584  | 2.72921E-06 | 6.60468E-05 |
|           | p38/JNK                            | p38                                   | up              | FOSL1    | 1.511246682  | 4.05091E-06 | 8.16934E-05 |
|           | p38/JNK                            | p38                                   | up              | MAFF     | 1.478042154  | 6.70678E-06 | 0.000115931 |
|           | p38/JNK                            | p38                                   | up              | OAS1     | 1.19449399   | 0.000526071 | 0.002893389 |
|           | ROS                                | NFkB/transcr. regulated under hypoxia | up              | HIF1A    | 1.490681577  | 5.37586E-05 | 0.00065048  |
|           | ROS                                | NFkB                                  | up              | HMOX1    | 1.085687217  | 0.013562062 | 0.035674119 |
|           | UPR/ER stress                      | UPR target gene                       | down            | EPHB1    | -1.803718817 | 1.01655E-06 | 4.10009E-05 |
|           | UPR/ER stress                      | UPR target gene                       | up              | HERPUD1  | 1.015708212  | 0.000245846 | 0.00165263  |



## H1437 lung CDX

|           | Process (Functional gene grouping) | Upstream Pathway/Transcription Factor | expressionCond1 | ID       | logFC        | P.Value     | adj.P.Val   |
|-----------|------------------------------------|---------------------------------------|-----------------|----------|--------------|-------------|-------------|
| PAC vs d0 | apoptosis                          | p53/NFkB                              | down            | TRAF1    | -2.005655965 | 9.69293E-07 | 3.90948E-05 |
|           | apoptosis                          | p53/NFkB                              | down            | BCL2     | -1.617170634 | 3.56854E-06 | 0.000107948 |
|           | apoptosis                          | p53/NFkB                              | down            | TP53AIP1 | -1.778741559 | 6.33584E-06 | 0.000127773 |
|           | apoptosis                          | p53/NFkB                              | up              | IER3     | 1.348605002  | 1.26163E-05 | 0.000218081 |
|           | apoptosis                          | NFkB                                  | down            | ALOX12   | -1.341068964 | 0.000504107 | 0.003258684 |
|           | apoptosis                          | NFkB                                  | down            | NOS2A    | -2.163061512 | 0.000585419 | 0.00346564  |
|           | apoptosis                          | p53                                   | down            | BCL2L14  | -1.073715416 | 0.0007265   | 0.00399575  |
|           | cell cycle                         |                                       | down            | TP73     | -2.32592196  | 8.18118E-09 | 9.89923E-07 |
|           | cell cycle                         | p53/NFkB                              | down            | TERT     | -1.818063518 | 6.28131E-06 | 0.000127773 |
|           | cell cycle                         | p53                                   | down            | CCNG1    | -1.389179567 | 2.40452E-05 | 0.000363684 |
|           | DNA damage/repair                  | HIF1a                                 | down            | XPA      | -1.193623749 | 4.6059E-05  | 0.000619238 |
|           | DNA damage/repair                  | prosurvival signals and oncogenes     | down            | BLM      | -1.298156571 | 5.45866E-05 | 0.000660498 |
|           | DNA damage/repair                  | p53                                   | down            | SESNI    | -1.057576028 | 9.77233E-05 | 0.001074956 |
|           | p38/JNK                            | p38                                   | up              | PHLDA1   | 1.012846155  | 0.000248105 | 0.002309285 |
|           | ROS                                | NFkB/transcr. regulated under hypoxia | up              | HIF1A    | 1.180760224  | 0.000601475 | 0.00346564  |
|           | UPR/ER stress                      | UPR target gene                       | down            | EPHB1    | -1.981288875 | 2.68508E-07 | 1.62447E-05 |
|           | UPR/ER stress                      | UPR target gene                       | down            | PLA2G6   | -1.019594051 | 0.000325182 | 0.002481483 |
| MF vs d0  | apoptosis                          | p53/NFkB                              | down            | BCL2     | -1.960611405 | 2.46702E-07 | 1.49255E-05 |
|           | apoptosis                          | p53/NFkB                              | up              | IER3     | 1.594328692  | 1.41718E-06 | 4.28698E-05 |
|           | apoptosis                          | NFkB                                  | down            | BCL2L1   | -1.314326066 | 0.000144866 | 0.001433282 |
|           | apoptosis                          | p53/NFkB                              | down            | TP53AIP1 | -1.210185287 | 0.000478411 | 0.002893389 |
|           | apoptosis                          | NFkB                                  | down            | NOS2A    | -1.542577832 | 0.008384952 | 0.02601485  |
|           | cell cycle                         |                                       | down            | TP73     | -1.860393869 | 2.42734E-07 | 1.49255E-05 |
|           | cell cycle                         | p53/NFkB                              | down            | TP63     | -1.35710972  | 0.000150902 | 0.001433282 |
|           | cell cycle                         | p53/NFkB                              | down            | TERT     | -1.374074016 | 0.000165834 | 0.001433282 |
|           | cell cycle                         | p53                                   | down            | CCNA2    | -1.021728382 | 0.005285863 | 0.019381499 |
|           | DNA damage/repair                  | p53/NFkB                              | down            | TP53I3   | -1.529581821 | 8.14596E-06 | 0.000123208 |
|           | DNA damage/repair                  | HIF1a                                 | down            | XPA      | -1.232022901 | 3.18621E-05 | 0.000428368 |
|           | DNA damage/repair                  | transcr. inducible by irradiation     | down            | XRCC3    | -1.031817735 | 0.000162619 | 0.001433282 |
|           | DNA damage/repair                  | prosurvival signals and oncogenes     | down            | BLM      | -1.088122797 | 0.000354517 | 0.00225771  |
|           | p38/JNK                            | p38                                   | up              | PHLDA1   | 1.485114584  | 2.72921E-06 | 6.60468E-05 |
|           | p38/JNK                            | p38                                   | up              | FOSL1    | 1.511246682  | 4.05091E-06 | 8.16934E-05 |
|           | p38/JNK                            | p38                                   | up              | MAFF     | 1.478042154  | 6.70678E-06 | 0.000115931 |
|           | p38/JNK                            | p38                                   | up              | OAS1     | 1.19449399   | 0.000526071 | 0.002893389 |
|           | ROS                                | NFkB/transcr. regulated under hypoxia | up              | HIF1A    | 1.490681577  | 5.37586E-05 | 0.00065048  |
|           | ROS                                | NFkB                                  | up              | HMOX1    | 1.085687217  | 0.013562062 | 0.035674119 |
|           | UPR/ER stress                      | UPR target gene                       | down            | EPHB1    | -1.803718817 | 1.01655E-06 | 4.10009E-05 |
|           | UPR/ER stress                      | UPR target gene                       | up              | HERPUD1  | 1.015708212  | 0.000245846 | 0.00165263  |

## Primary human ovarian cancer

|           | Process (Functional gene grouping) | Upstream Pathway/Transcription Factor          | expressionCond1 | ID        | logFC        | P.Value | adj.P.Val   |
|-----------|------------------------------------|------------------------------------------------|-----------------|-----------|--------------|---------|-------------|
| PAC vs d0 | apoptosis                          | p53/NFkB                                       | up              | BCL2A1    | 2.497867992  | 5.3E-06 | 6.74825E-05 |
|           | apoptosis                          | p53                                            | down            | BCL2L14   | -1.346953455 | 5.4E-06 | 6.74825E-05 |
|           | apoptosis                          | NFkB/p53                                       | down            | BCL2      | -1.547595207 | 6.9E-06 | 7.41686E-05 |
|           | apoptosis                          | p53/NFkB                                       | down            | TNFRSF10C | -1.88394435  | 4.3E-05 | 0.000336453 |
|           | apoptosis                          | NFkB                                           | up              | ALOX12    | 1.231788946  | 0.00014 | 0.000938375 |
|           | apoptosis                          | p53/NFkB                                       | up              | TNFRSF10D | 1.656011791  | 0.00054 | 0.002697508 |
|           | apoptosis                          | prosurvival signals and oncogenes              | down            | MCL1      | -1.271420996 | 0.00147 | 0.00637863  |
|           | apoptosis                          | p53                                            | down            | BOK       | -1.54807767  | 0.00253 | 0.008858494 |
|           | apoptosis                          | p53                                            | down            | AIFM2     | -1.389081402 | 0.01295 | 0.036144035 |
|           | apoptosis                          | p53                                            | up              | BID       | 1.60577072   | 0.0132  | 0.036144035 |
|           | DNA damage and repair              | p53                                            | down            | SESN1     | -1.103777569 | 9.8E-06 | 9.45751E-05 |
|           | DNA damage and repair              | p53/BRCA1/AP1                                  | down            | DDB2      | -1.577525339 | 1.1E-05 | 0.000101612 |
|           | DNA damage and repair              | p53/NFkB                                       | down            | TP53I3    | -1.219450194 | 0.00056 | 0.002708023 |
|           | p38/JNK                            | p38                                            | down            | ZFP36     | -3.740621121 | 5.7E-08 | 2.39049E-06 |
|           | p38/JNK                            | NFkB/p38                                       | down            | EGR1      | -3.218010563 | 5.2E-07 | 1.09336E-05 |
|           | p38/JNK                            | p53/p38                                        | down            | FOS       | -3.656475621 | 3.5E-06 | 5.46255E-05 |
|           | p38/JNK                            | p38                                            | down            | KLF6      | -1.994997011 | 7.1E-06 | 7.41686E-05 |
|           | p38/JNK                            | p38                                            | down            | JUN       | -2.323023863 | 3.9E-05 | 0.000327878 |
|           | proliferation/cell cycle           | p53                                            | down            | BTG2      | -1.941150382 | 5E-05   | 0.000368495 |
|           | proliferation/cell cycle           | p53                                            | down            | TAp73     | -1.13745292  | 0.00038 | 0.002136084 |
|           | proliferation/cell cycle           | P53                                            | up              | MET       | 2.239782463  | 9.5E-07 | 1.70356E-05 |
|           | ROS                                | NFkB                                           | up              | SOD2      | 2.669122427  | 5.1E-08 | 2.39049E-06 |
|           | ROS                                | NFkB/transcriptionally regulated under hypoxia | up              | HIF1A     | 1.340615279  | 2.9E-07 | 9.2002E-06  |
|           | UPR/ER stress                      | UPR target gene                                | down            | P2RY13    | -3.967102064 | 2.6E-08 | 2.39049E-06 |
|           | UPR/ER Stress                      | UPR target gene                                | down            | PLA2G6    | -2.117862586 | 4.1E-07 | 1.04367E-05 |
| MF vs d0  | apoptosis                          | p53                                            | up              | BID       | 1.948010859  | 0.00191 | 0.015065792 |
|           | apoptosis                          | p53/NFkB                                       | up              | TNFRSF10D | 1.366213542  | 0.00245 | 0.015835591 |
|           | apoptosis                          | p53/NFkB                                       | down            | TNFRSF10C | -1.181590608 | 0.00278 | 0.016683948 |
|           | apoptosis                          | p53                                            | down            | AIFM2     | -1.4107915   | 0.00546 | 0.029887122 |
|           | DNA damage and repair              | p53                                            | down            | SESN1     | -1.163423685 | 1.7E-06 | 7.17468E-05 |
|           | p38/JNK                            | p38/NFkB                                       | down            | EGR1      | -3.006268061 | 9.7E-07 | 6.12749E-05 |
|           | p38/JNK                            | p38                                            | down            | KLF6      | -2.002300567 | 6.7E-06 | 0.000151033 |
|           | p38/JNK                            | p38                                            | down            | ZFP36     | -2.707360488 | 7.2E-06 | 0.000151033 |
|           | p38/JNK                            | p53/p38                                        | down            | FOS       | -3.179653737 | 1.6E-05 | 0.000282371 |
|           | p38/JNK                            | p38                                            | down            | JUN       | -1.985817176 | 0.00012 | 0.001416227 |
|           | proliferation/cell cycle           | p53                                            | up              | MET       | 1.712337971  | 2E-05   | 0.000283739 |
|           | proliferation/cell cycle           | p53                                            | down            | BTG2      | -2.014378658 | 2E-05   | 0.000283739 |
|           | ROS                                | NFkB                                           | up              | SOD2      | 1.418166346  | 0.00036 | 0.00373487  |
|           | UPR/ER stress                      | UPR target gene                                | down            | P2RY13    | -3.402881578 | 3.7E-08 | 4.65838E-06 |
|           | UPR/ER Stress                      | UPR target gene                                | down            | PLA2G6    | -1.816476504 | 2.8E-06 | 8.68389E-05 |
